# Supplementary material for: Strain differences in arsenic-induced oxidative lesion via arsenic biomethylation between C57BL/6J and 129X1/SvJ mice
Source: PubMed Central journal article supplement (PMC5355880; doi:10.1038/srep44424), 2017-03-17
Supplement: srep44424-s1.pdf [file srep44424-s1.pdf]

## Supplementary Information

### Strain differences in arsenic-induced oxidative lesion via arsenic biomethylation between C57BL/6 and 129X1/SvJ mice

Ruirui Wu, Xiafang Wu, Huihui Wang, Xin Fang, Yongfang Li, Lanyue Gao, Guifan Sun, Jingbo Pi\*, Yuanyuan Xu\*

Email: yyxu@cmu.edu.cn; jbp@cmu.edu.cn

Table S1. Genes and primers for real time RT-qPCR

| Gene         | GenBank Accession No. | Primers (5'→3')                                                     |
|--------------|-----------------------|---------------------------------------------------------------------|
| <i>Homx1</i> | NM_010442.2           | Forward: CCTCACTGGCAGGAAATCATC<br>Reverse: CCTCGTGGAGACGCTTTACATA   |
| <i>Nqo1</i>  | NM_008706.5           | Forward: TATCCTTCCGAGTCATCTCTAGCA<br>Reverse: TCTGCAGCTTCCAGCTTCTTG |
| <i>Gclc</i>  | NM_010295.2           | Forward: TGGCCACTATCTGCCCAATT<br>Reverse: GTCTGACACGTAGCCTCGGTAA    |
| <i>Gclm</i>  | NM_008129             | Forward: ACATTGAAGCCCAGGATTGG<br>Reverse: CCCCTGCTCTTCACGATGAC      |
| <i>Gs</i>    | NM_008180.2           | Forward: TGCGGTGGTGCTACTGATTG<br>Reverse: CGGCACGCTGGTCAAATAT       |
| <i>Gr</i>    | NM_010344.4           | Forward: GCACTTGCGTGAATGTTGGA<br>Reverse: CGTGATCGTGCATGAATTCC      |
| <i>Cyt19</i> | NM_020577.2           | Forward: GGACGTGGAGATCGTGAGTC                                       |

|                                 |                 |                                 |
|---------------------------------|-----------------|---------------------------------|
|                                 |                 | Reverse: CTGCAGACTTTCCCGGATGT   |
| <i>Mtr</i>                      | NM_001081128.3  | Forward: AACACTTGGCCTACCGGATG   |
|                                 |                 | Reverse: TCTGGCCTTTCCACAGATGG   |
| <i>Mthfr1/2</i>                 | NM_001161798.1; | Forward: ACCTGAAAAGCAAGTCCCCC   |
|                                 | NM_010840.3     | Reverse: GGCAGGTTACTCTGTAGCCA   |
| <i>Pnp</i>                      | NM_013632.4     | Forward: AAGTTCTGGATGCCGGGAAA   |
|                                 |                 | Reverse: AGAGAGCTACTTGGACCCCA   |
| <i>Gst<math>\mu</math>1</i>     | NM_010358.5     | Forward: CAAGATCACCCAGAGCAATGC  |
|                                 |                 | Reverse: CATCCAGGTGGTGCTTTCG    |
| <i>Gst<math>\theta</math>1</i>  | NM_008185.3     | Forward: CTGTACCTGGATCTGCTGTCG  |
|                                 |                 | Reverse: TAGCCACACTCTCACACAGGG  |
| <i>Gst<math>\omega</math>1</i>  | NM_010362.3     | Forward: GGATGAGGCCTACCCAGAGA   |
|                                 |                 | Reverse: CAAAGGCGGCACCTTAGAGA   |
| <i>Gst<math>\omega</math>2</i>  | NM_026619.2;    | Forward: GTTCCAGGGGAGTAGTTGCC   |
|                                 | NM_030051.1     | Reverse: ACAGTCGACAGCACTCTTGC   |
| <i><math>\beta</math>-actin</i> | NM_007393.5     | Forward: CACTGTCGAGTCGCGTCC     |
|                                 |                 | Reverse: TCATCCATGGCGAACTGGTG   |
| <i>Gapdh</i>                    | NM_001289726.1; | Forward: GTATGACTCCACTCACGGCAAA |
|                                 | NM_008084.3     | Reverse: GGTCTCGCTCCTGGAAGATG   |
| <i>Aqp3</i>                     | NM_016689.2     | Forward: GCTTTTGGCTTCGCTGTCAC   |
|                                 |                 | Reverse: TAGATGGGCAGCTTGATCCAG  |
| <i>Aqp7</i>                     | NM_007473.4     | Forward: AATATGGTGCGAGAGTTTCTGG |

|             |                |                                   |
|-------------|----------------|-----------------------------------|
|             |                | Reverse: AACCCAAGTTGACACCGAGAT    |
| <i>Aqp9</i> | NM_022026.3;   | Forward: TGGTGTCTACCATGTTTCCTCC   |
|             | NM_001271843.1 | Reverse: AACCCAGAGTTGAGTCCGAGAG   |
| <i>Mrp1</i> | NM_008576.3    | Forward: CATGTGGACGTGTTTCGAGATT   |
|             |                | Reverse: CACGAGCTGAACAAGCACAAG    |
| <i>Mrp2</i> | NM_013806.2    | Forward: CGACCATCCGGAACGAGTT      |
|             |                | Reverse: CCGCTGTCTAGGACCATTATCT   |
| <i>Mrp3</i> | NM_029600.3    | Forward: AGTTTGGCCCGAGCTGTTTA     |
|             |                | Reverse: CAGCCGACAGTGGGTCATC      |
| <i>Mrp4</i> | NM_001163676.1 | Forward: ACGCTTCCCAGACTTTGCA      |
|             |                | Reverse: AACCAACACGGGAGCCTTCAG    |
| <i>Mrp5</i> | NM_013790.2;   | Forward: CCCTTCCGGACCACTACCA      |
|             | NM_176839.1    | Reverse: TGTAGGAGAAAAGTCCAGCATTGT |
| <i>Mrp6</i> | NM_021050.2    | Forward: CAGCTCAAACA ACTGGAATCTGA |
|             |                | Reverse: GCTCGAAGTGTCCAGAGTCCTT   |

---

All primers are from Sigma-Aldrich.

**Figure**

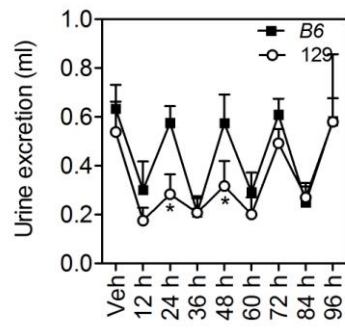

Figure S1 Urine excretion by B6 (closed squares) and 129 (open circles) mice.
